# Supplementary material for: Towards a simple in vitro surface chemistry pre-screening method for nanoparticles to be used for drug delivery to solid tumours
Source: Royal Society of Chemistry journal article supplement (doi:10.1039/d3bm00966a), 2023-01-01
Supplement: d3bm00966a1.pdf [file d3bm00966a1.pdf]

## Supporting Information

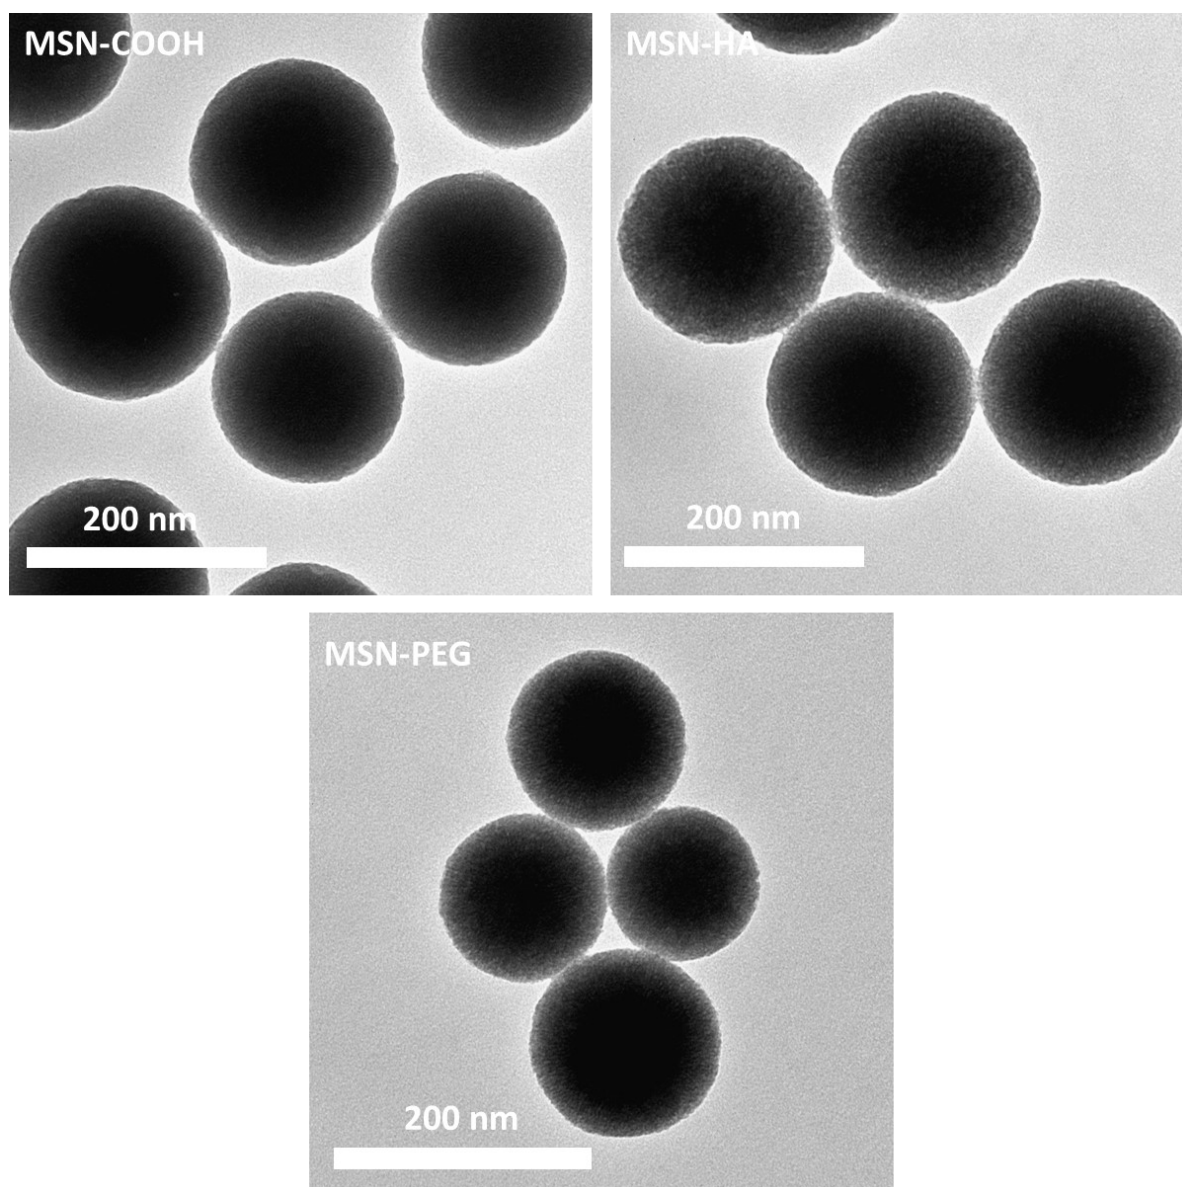

**Figure S1.** Exemplary transmission electron microscopy image of MSN-COOH, MSN-PEG and MSN-HA particles.

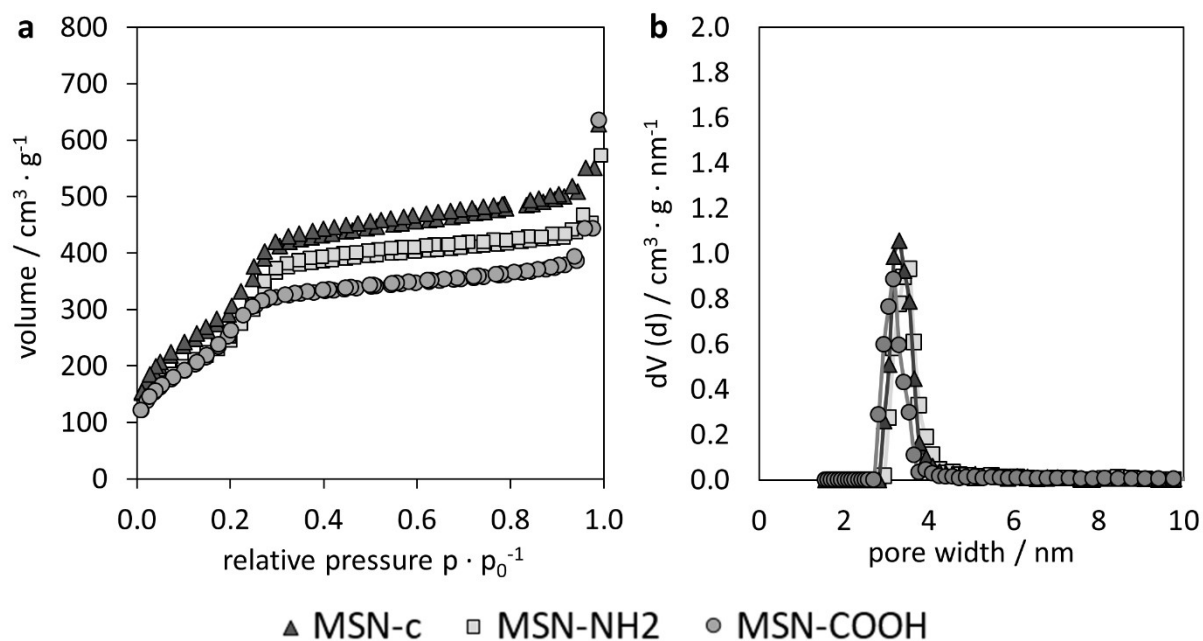

**Figure S2.** a) Nitrogen sorption isotherms of the basic particles MSN-NH<sub>2</sub>, MSN-COOH and calcined MSN-c. b) Corresponding pore size distributions calculated using the equilibrium NLDFT kernel developed for silica.

**Table S1.** Data from the nitrogen sorption measurements of MSN-COOH, MSN-NH<sub>2</sub> and the basic calcined MSNc

|                     | specific surface area /<br>m <sup>2</sup> · g <sup>-1</sup> | pore volume /<br>cm <sup>3</sup> · g <sup>-1</sup> | pore diameter/<br>nm |
|---------------------|-------------------------------------------------------------|----------------------------------------------------|----------------------|
| MSN-c               | 1048                                                        | 0.74                                               | 3.3                  |
| MSN-NH <sub>2</sub> | 869                                                         | 0.64                                               | 3.5                  |
| MSN-COOH            | 842                                                         | 0.55                                               | 3.2                  |

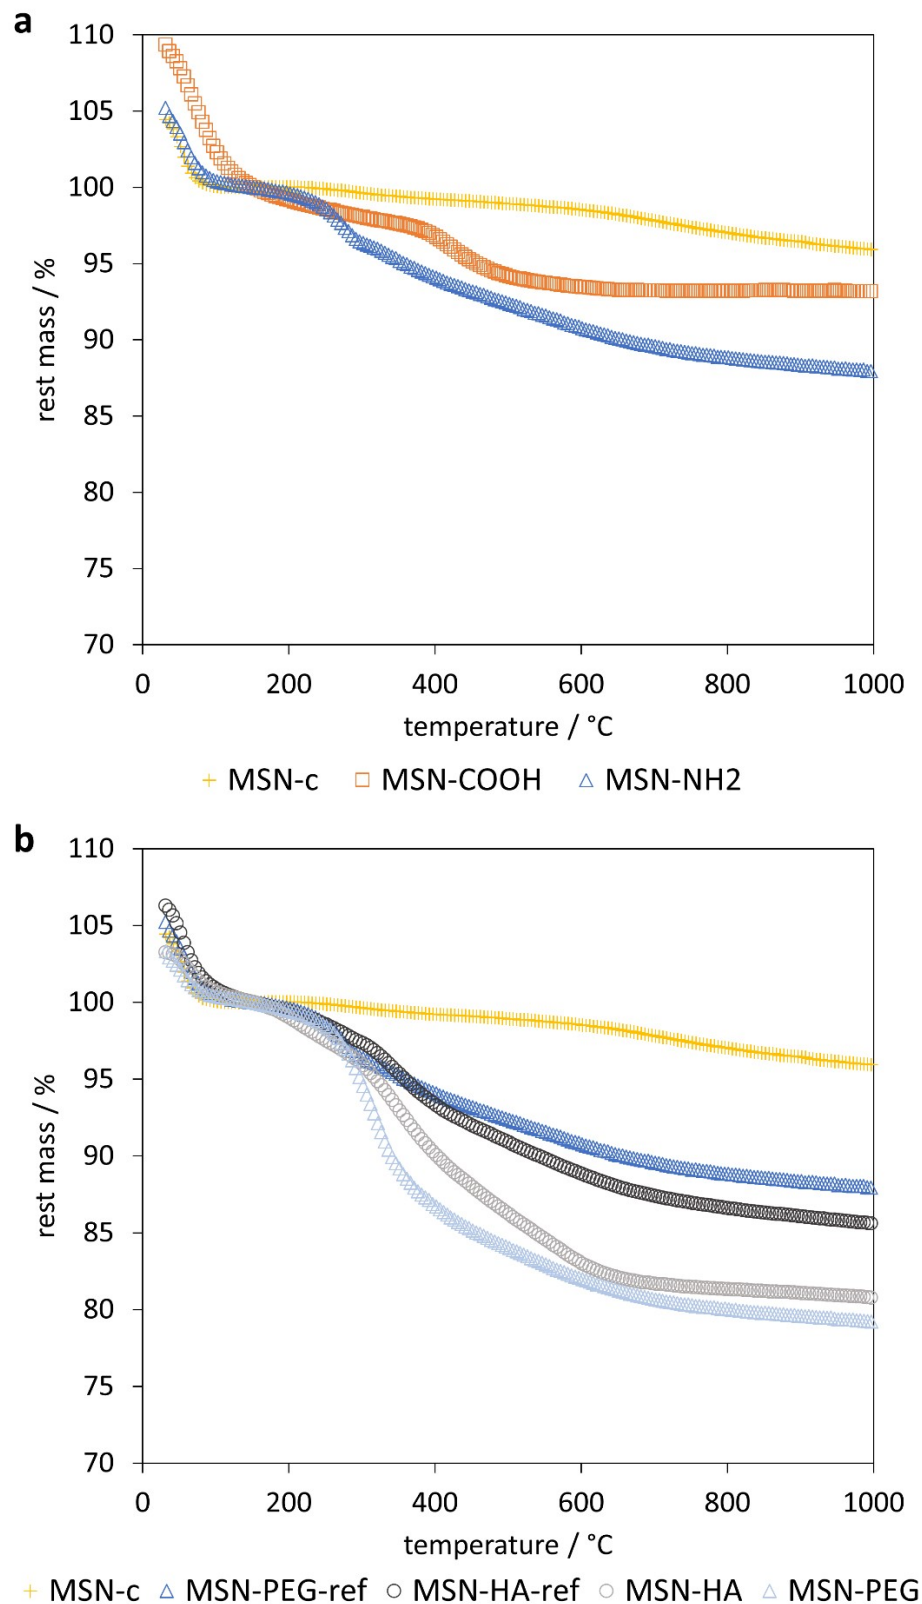

**Figure S3.** Exemplary thermogravimetric measurements of calcined MSN-c, MSN-COOH, MSN-NH<sub>2</sub>, MSN-HA and MSN-PEG. For the quantification of grafted polymer, the native particles were incubated in the respective solvent without HA or PEG to account for hydrolysis-related mass losses ('ref').

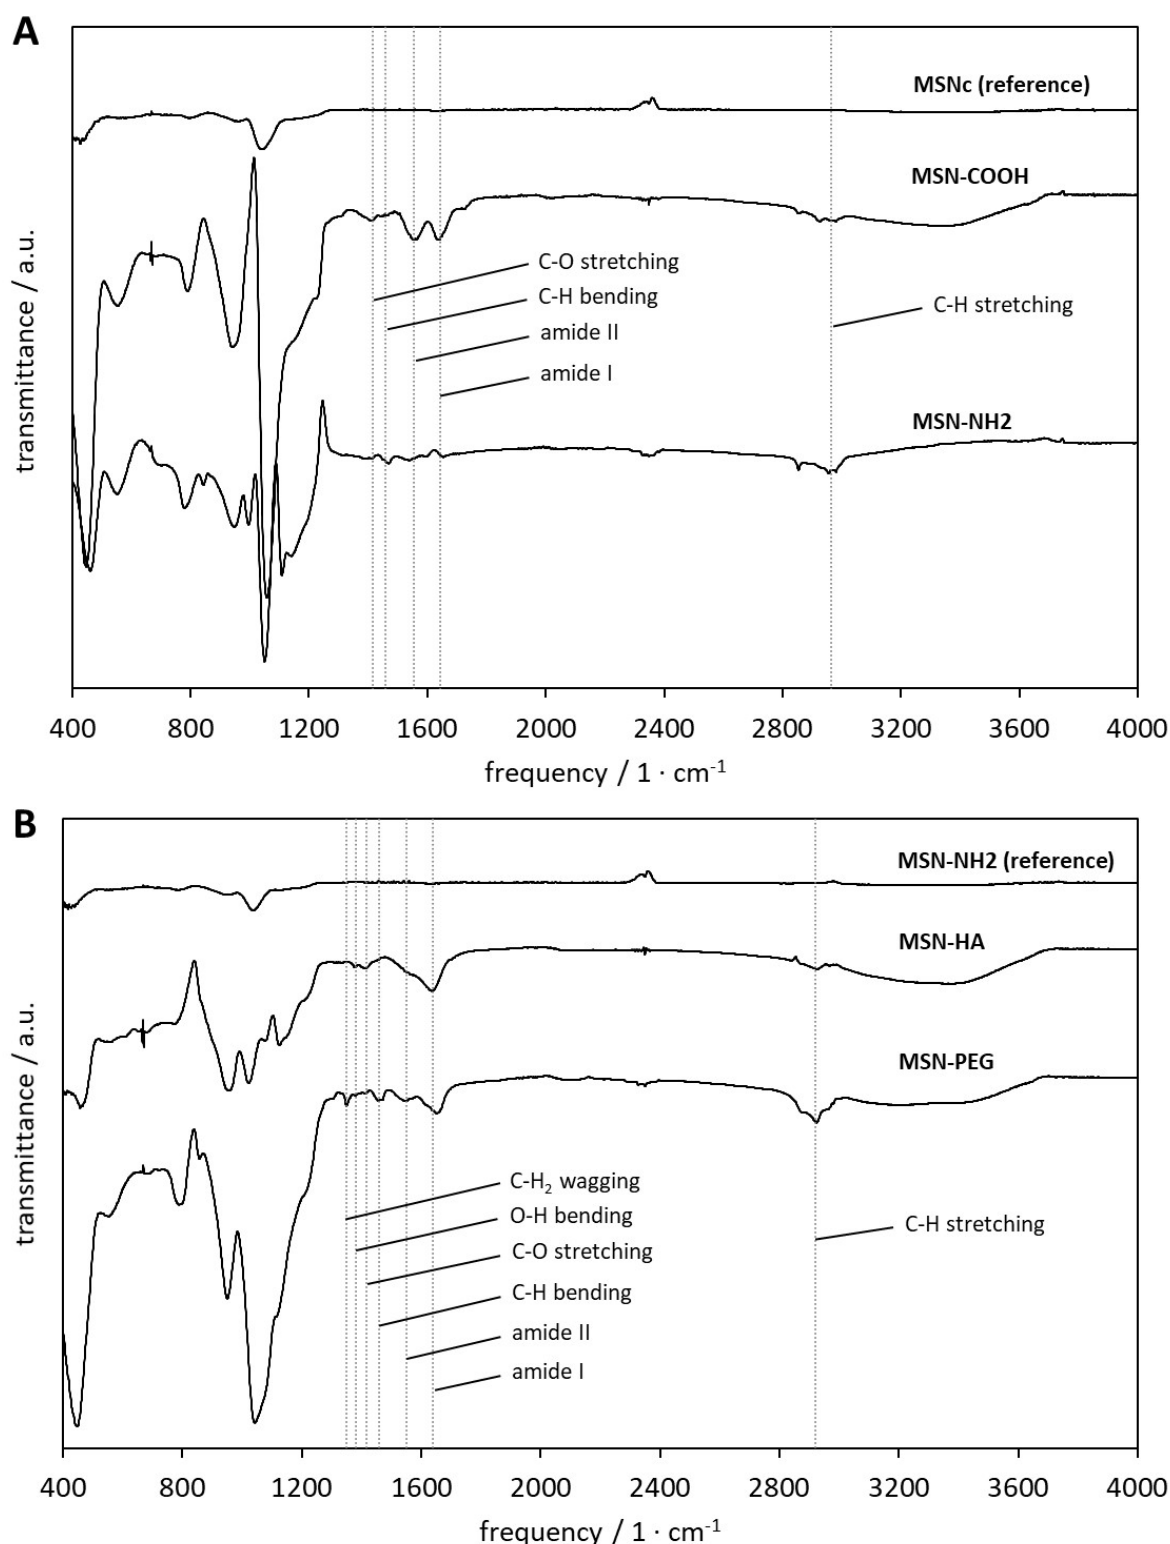

**Figure S4.** Exemplary ATR-IR spectroscopic analysis of different MSN types used in this study. A) IR spectra of MSN-COOH and MSN-NH<sub>2</sub>; IR spectrum of non-functionalized, calcined MSN-c particle was subtracted as background spectrum. B) IR spectra of MSN-HA and MSN-PEG; IR spectrum of the basic amino-functionalized MSN-NH<sub>2</sub> particle was subtracted as background spectrum. Bands in the spectra of MSNs assignable to the various functional groups are highlighted in the figure (dashed lines). ([doi.org/10.1002/bip.10245](https://doi.org/10.1002/bip.10245), [doi.org/10.1016/0008-6215\(94\)00147-2](https://doi.org/10.1016/0008-6215(94)00147-2), [doi.org/10.3390/ijms13066639](https://doi.org/10.3390/ijms13066639))

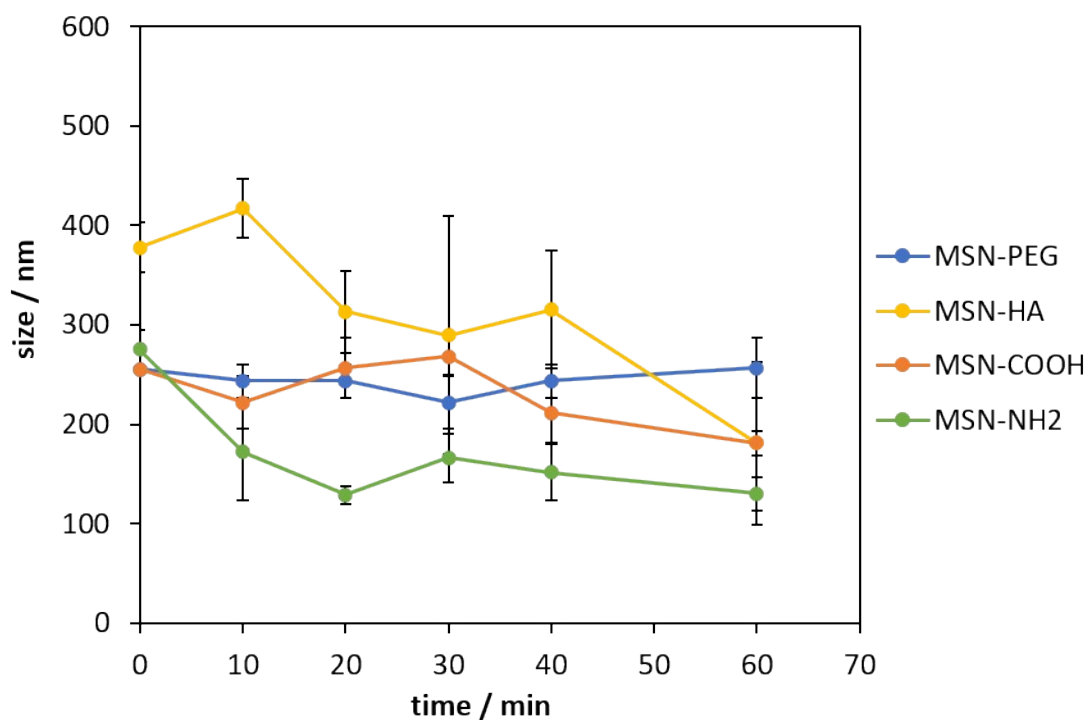

**Figure S5.** Mean hydrodynamic diameter measured by light-scattering as a function of incubation time in 10% FCS at a particle concentration of 10  $\mu\text{g/mL}$ .

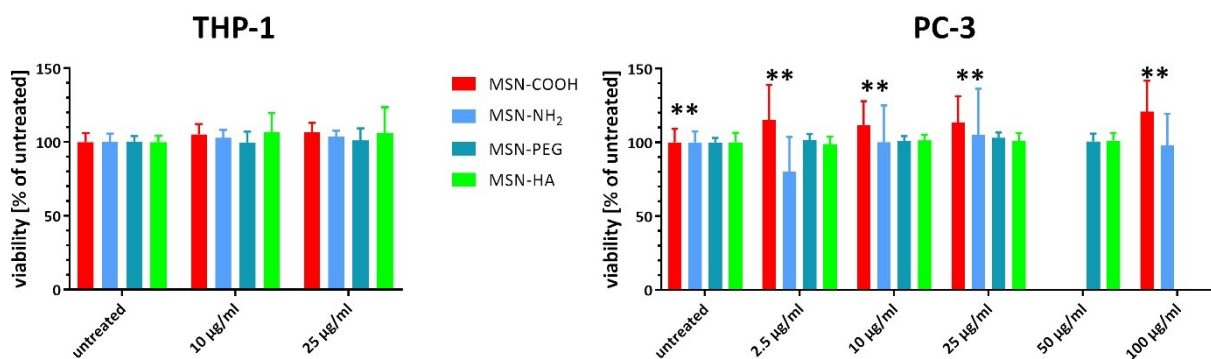

**Figure S6.** Cell populations were incubated with nanoparticles at indicated amounts for 24 h prior to cell viability testing using the Cell Titer Blue assay. The graph shows mean viability  $\pm$  standard deviation (SD) as percentages of the untreated control, respectively. Three to four independent experiments were performed in triplicates ( $N = 9-12$ ). Asterisks denote experiments which were carried out with parental, not genetically engineered PC-3 cells (please see methods section for details).

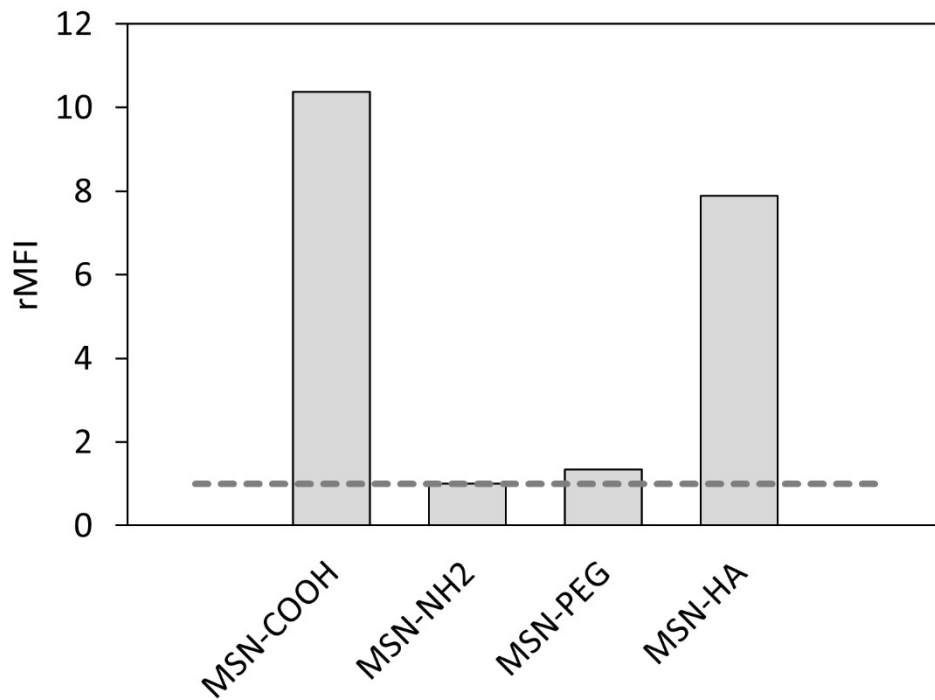

**Figure S7.** Mean fluorescence intensities (MFIs) of ATTO647N-labelled MSNs were measured in aqueous sucrose solution (10 %) at a particle concentration of  $100 \mu\text{g ml}^{-1}$ . The respective MFIs were normalized on the MFI of MSN-NH<sub>2</sub> resulting in rated MFIs (rMFIs) to compensate for differences in particle fluorescence intensities. The dashed line indicates a rMFI of 1.

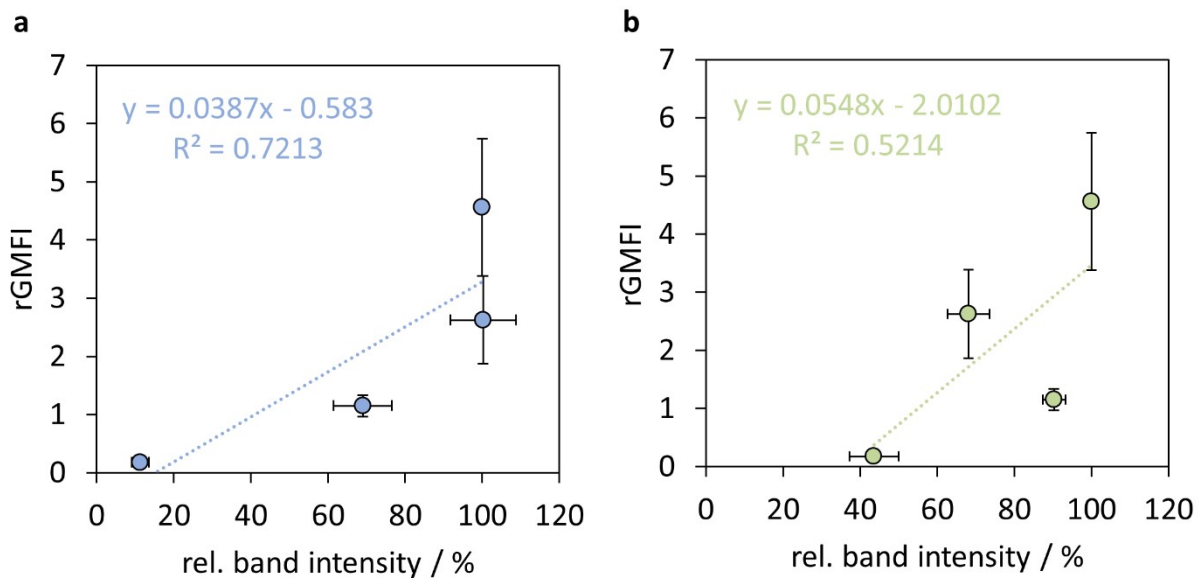

**Figure S8.** rGMFIs of THP-1 cells measured via flow cytometry after treatment with ATTO647-labelled MSNs at  $10 \mu\text{g mL}^{-1}$  for 24 h and  $37^\circ\text{C}$  as a function of relative band intensity for the a) high molecular weight proteins and b) low molecular weight proteins ( $n = 3$ , error bars are SD).
